# Supplementary material for: Near-infrared and visible light dual-mode organic photodetectors
Source: PubMed Central journal article supplement — Sci Adv. 2020 Jan 31;6(5):eaaw8065. doi: 10.1126/sciadv.aaw8065 (PMC6994203; doi:10.1126/sciadv.aaw8065), 2020-01-31
Supplement: aaw8065_SM.pdf [file aaw8065_SM.pdf]

## Supplementary Materials for

### Near-infrared and visible light dual-mode organic photodetectors

Zhaojue Lan, Yanlian Lei, Wing Kin Edward Chan, Shuming Chen, Dan Luo\*, Furong Zhu\*

\*Corresponding author. Email: luod@sustc.edu.cn (D.L.); frzhu@hkbu.edu.hk (F.Z.)

Published 31 January 2020, *Sci. Adv.* **6**, eaaw8065 (2020)

DOI: 10.1126/sciadv.aaw8065

#### This PDF file includes:

Fig. S1. Bias polarity–dependent spectral responses of a P3HT:PTB7-Th:PC<sub>70</sub>BM (70:30:1)–based PM OPD.

Fig. S2. Schematic energy level diagram of the functional materials used in the dual-mode OPDs.

Fig. S3. EQE spectra measured for the trilayer dual-mode OPD at different reverse and forward biases.

Fig. S4. A schematic diagram illustrating the setup for the measurement of the dual-mode OPD.

Fig. S5. Charge transport properties of the P3HT:PC<sub>70</sub>BM (100:1)– and P3HT:PTB7-Th:PC<sub>70</sub>BM (70:30:1)–based single-carrier devices were analyzed using the space charge–limited current technique.

Fig. S6. Optical constants of the functional layers used in the optical simulation in this work.

Table S1. Summarized photodetection parameters.

1. OPD with a ternary single active layer

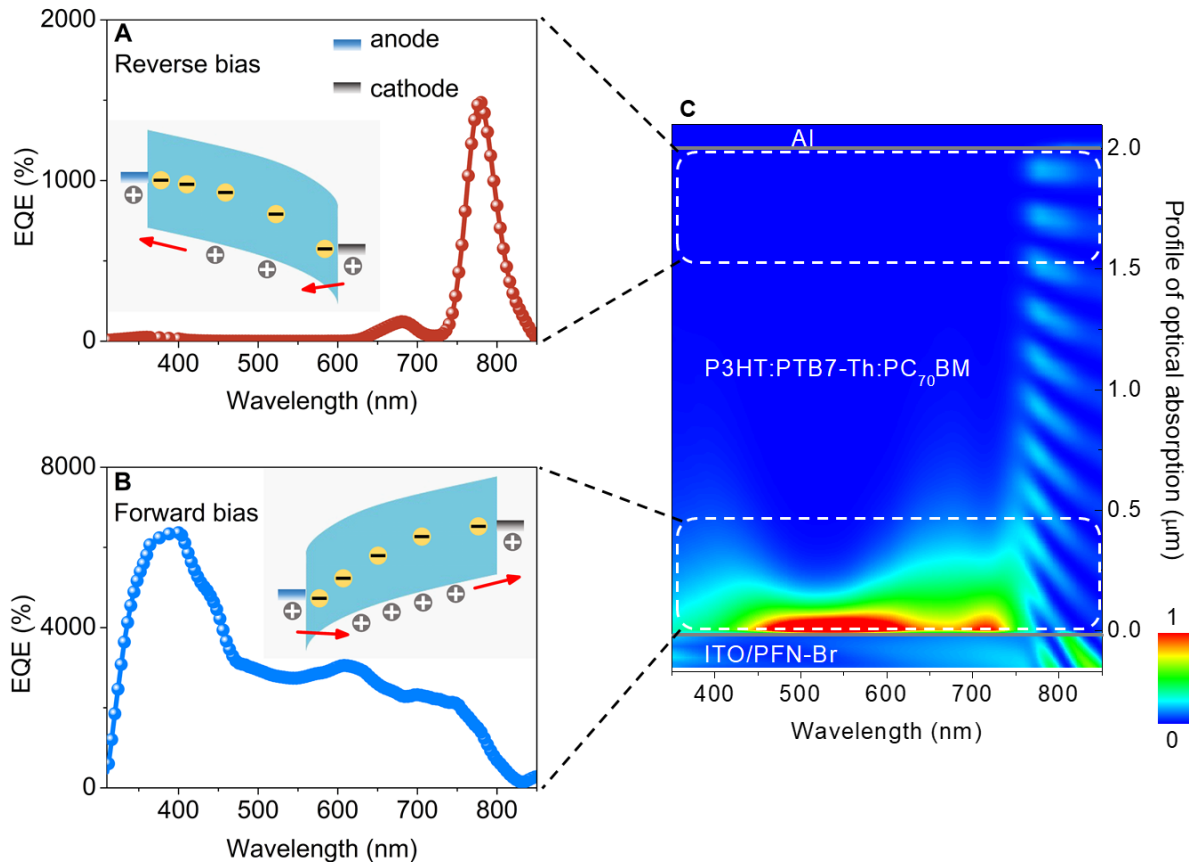

**Fig. S1. Bias polarity-dependent spectral responses of a P3HT:PTB7-Th:PC<sub>70</sub>BM (70:30:1)-based PM OPD.** EQE spectra measured for the PM OPD at (A) a reverse bias of -50 V and (B) a forward bias of 50 V, (C) distribution of photo-generated electrons in a 2000 nm thick P3HT:PTB7-Th:PC<sub>70</sub>BM (70:30:1)-based PM OPD. The inset in (A) illustrates the existence of the band bending and tunneling hole injection process at the organic/cathode interface in OPD operated at a reverse bias. The inset in (B) illustrates the presence of the band bending and tunneling hole injection process at the anode/organic interface in OPD operated at a forward bias.

## 2. Energy level diagram of dual-mode OPD

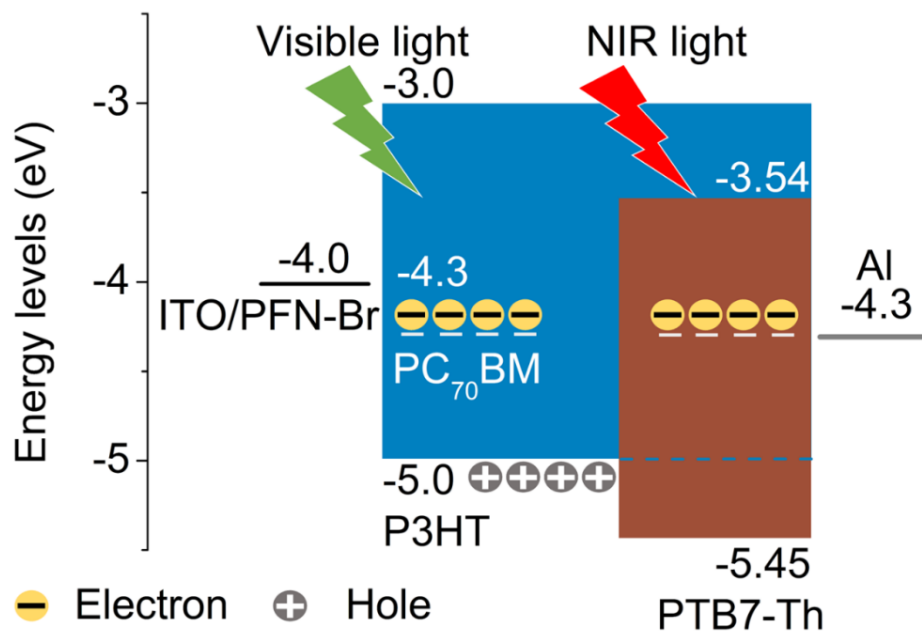

Fig. S2. Schematic energy level diagram of the functional materials used in the dual-mode OPDs.

## 3. EQE spectra of the dual-mode OPD

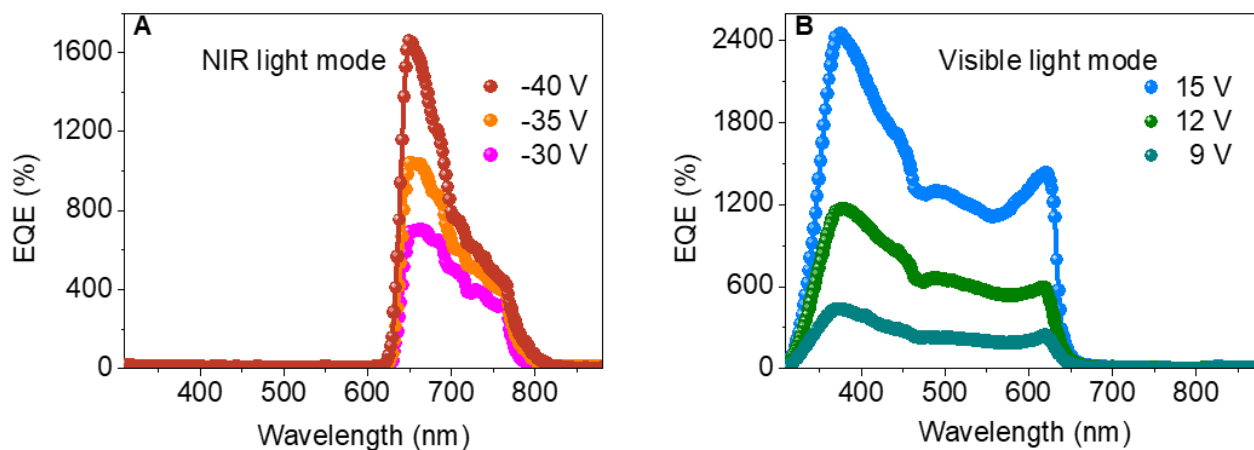

Fig. S3. EQE spectra measured for the trilayer dual-mode OPD at different reverse and forward biases. EQE spectra measured for the tri-layer dual-mode OPD at (A) different reverse biases of -30 V, -35 V and -40 V, and (B) different forward biases of 9 V, 12 V and 15 V.

4. *Dual-mode OPD measurement setup*

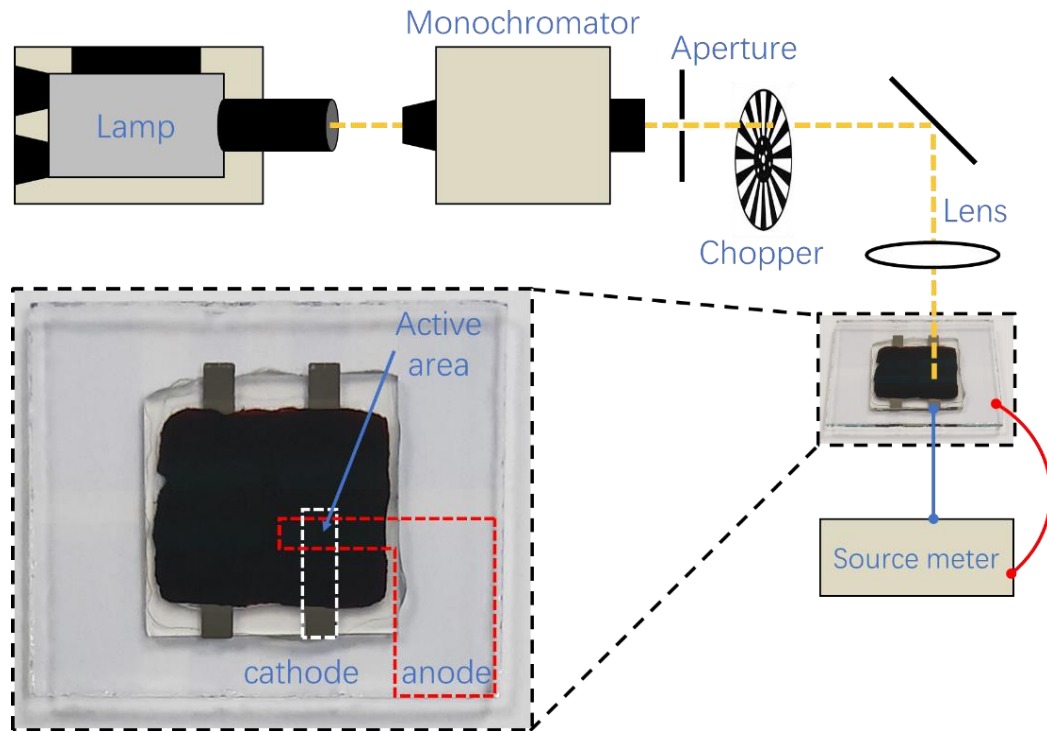

**Fig. S4.** A schematic diagram illustrating the setup for the measurement of the dual-mode OPD. The photo pictures were taken for the device, showing the layout of the cathode, anode and active region of the dual-mode OPD. (Zhaojue Lan, Hong Kong Baptist University)

5.  $J^{0.5}$ - $V$  characteristics of hole-only and electron-only devices

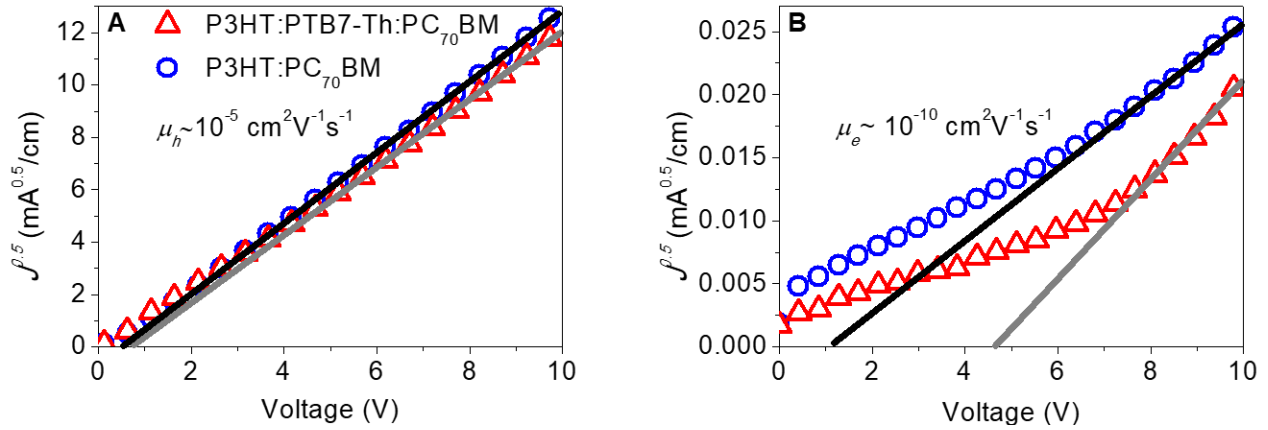

**Fig. S5. Charge transport properties of the P3HT:PC<sub>70</sub>BM (100:1)- and P3HT:PTB7-Th:PC<sub>70</sub>BM (70:30:1)-based single-carrier devices were analyzed using the space charge-limited current technique. (A)  $J^{0.5}$ - $V$  characteristics measured for the hole-only devices: ITO/PEDOT:PSS/P3HT:PC<sub>70</sub>BM (100:1)/Au (blue circles) and ITO/PEDOT:PSS/P3HT:PTB7-Th:PC<sub>70</sub>BM (70:30:1)/Au (red triangles). (B)  $J^{0.5}$ - $V$  characteristics measured for the electron-only devices: ITO/ZnO/P3HT:PC<sub>70</sub>BM (100:1)/LiF/Al (blue circles) and ITO/ZnO/P3HT:PTB7-Th:PC<sub>70</sub>BM (70:30:1)/LiF/Al (red triangles).**

## 6. Optical constants

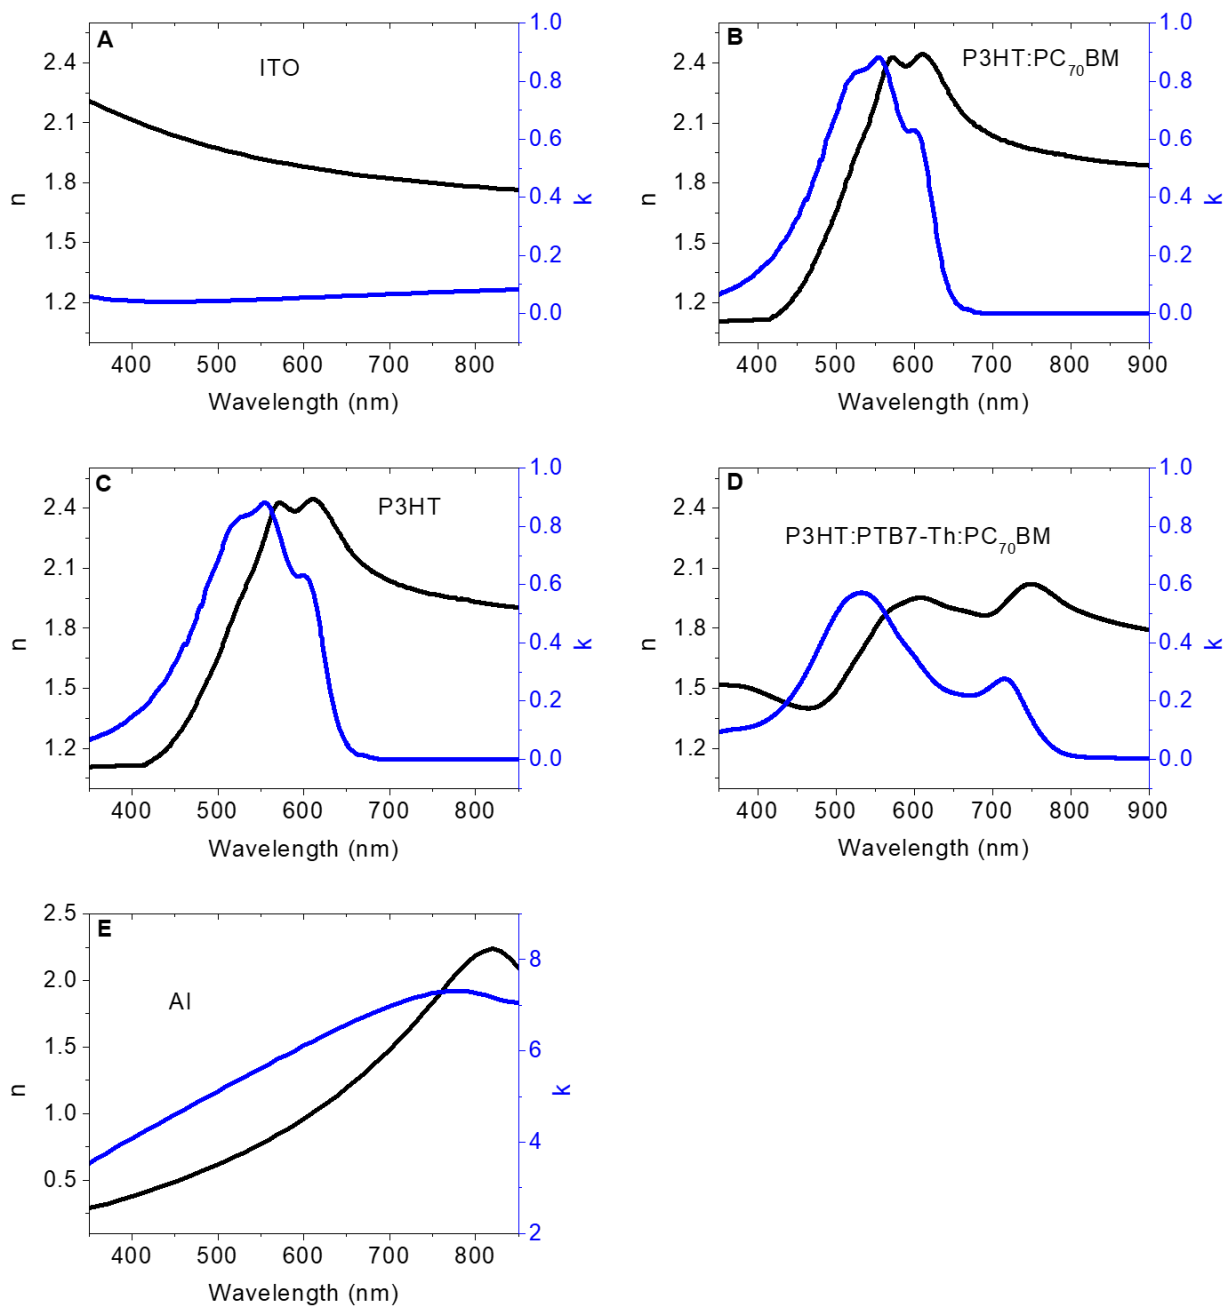

**Fig. S6. Optical constants of the functional layers used in the optical simulation in this work.** Optical constants,  $n(\lambda)$  and  $k(\lambda)$ , measured for the (A) ITO, (B) binary blend P3HT:PC<sub>70</sub>BM (100:1), (C) pristine P3HT, (D) ternary blend P3HT:PTB7-Th:PC<sub>70</sub>BM (70:30:1) layers, and (E) Al used in the optical simulation in this work.

**Table S1. Summarized photodetection parameters.** The maximum EQE and detectivity measured for the dual-mode OPD using a short wavelength (376 nm) and a long wavelength (654 nm) light sources, operated at different forward and reverse biases.

| Light sources | Bias (V) | Dark current ( $\times 10^{-7}$ A) | Responsivity (A/W) | EQE (%) | $D^*$ ( $\times 10^{12}$ Jones) |
|---------------|----------|------------------------------------|--------------------|---------|---------------------------------|
| 376 nm        | 9        | 0.67                               | 1.31               | 432     | 1.79                            |
|               | 12       | 0.88                               | 3.53               | 1163    | 4.20                            |
|               | 15       | 1.08                               | 7.47               | 2465    | 8.03                            |
|               | 18       | 1.33                               | 14.44              | 4767    | 14.01                           |
| 654 nm        | -30      | 1.07                               | 3.65               | 692     | 3.94                            |
|               | -35      | 1.33                               | 5.48               | 1040    | 5.32                            |
|               | -40      | 1.61                               | 8.66               | 1643    | 7.64                            |
|               | -45      | 2.16                               | 12.94              | 2454    | 9.85                            |
